# Supplementary material for: Different submicellar solubilization mechanisms revealed by 1H NMR and 2D diffusion ordered spectroscopy (DOSY)
Source: Royal Society of Chemistry journal article supplement (doi:10.1039/d0cp00429d), 2020-01-01
Supplement: d0cp00429d1.pdf [file d0cp00429d1.pdf]

Electronic Supplementary Material (ESI) for Physical Chemistry Chemical Physics.

This journal is © the Owner Societies 2020

**Supporting information: Different Submicellar Solubilization  
Mechanisms Revealed by  $^1\text{H}$  NMR and 2D Diffusion Ordered  
Spectroscopy (DOSY)**

Mengjian Wu<sup>a</sup>, Zhaoxia Wu<sup>a</sup>, Shangwu Ding<sup>b</sup>, Zhong Chen<sup>a</sup>, Xiaohong Cui<sup>a,\*</sup>

<sup>a</sup>Department of Electronic Science, Fujian Provincial Key Laboratory of Plasma and Magnetic Resonance, State Key Laboratory of Physical Chemistry of Solid Surfaces, Xiamen University, Xiamen, China.

<sup>b</sup>Department of Chemistry and Center for Nanoscience and Nanotechnology, National Sun Yat-sen University, Kaohsiung, Taiwan

\*E-mail of corresponding author: cuixh@xmu.edu.cn

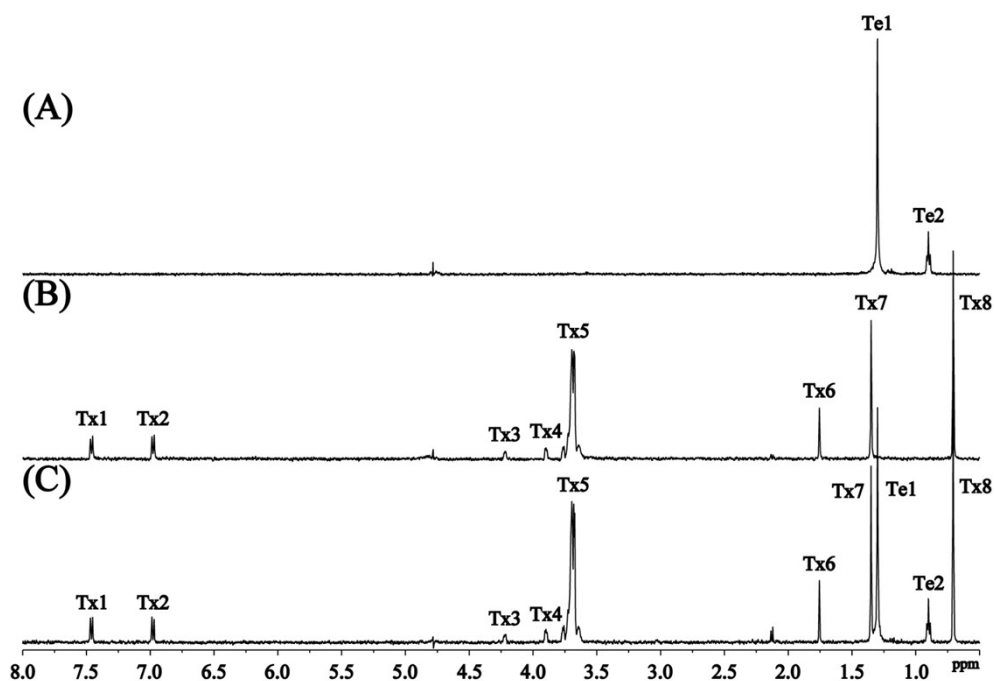

**Fig. S1.**  $^1\text{H}$  NMR spectra of the pure tetradecane saturated solution at the concentration of 0.0252 mM (A), the pure TX-100 solution at the concentration of 0.0771 mM (B) and the TX-100/tetradecane solution with the TX-100 concentration of 0.0842 mM (C).

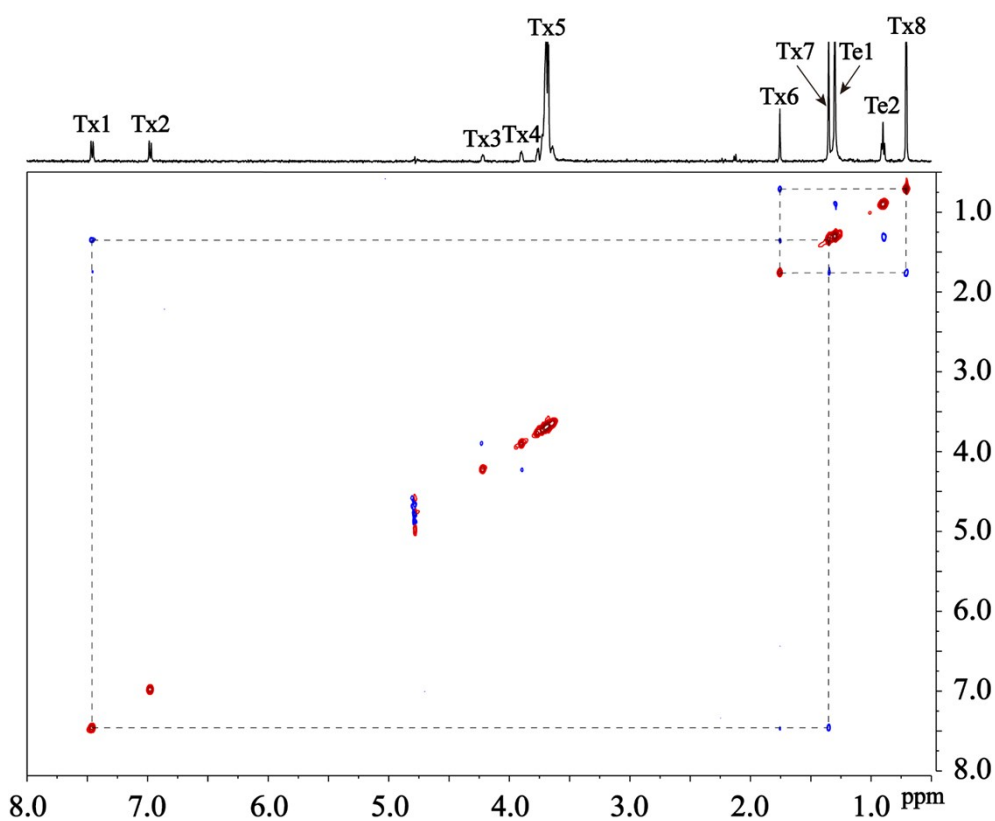

**Fig. S2.** 2D NOESY spectrum with a mixing time of 0.5 s for the TX-100/tetradecane solution with the TX-100 concentration of 0.114 mM.

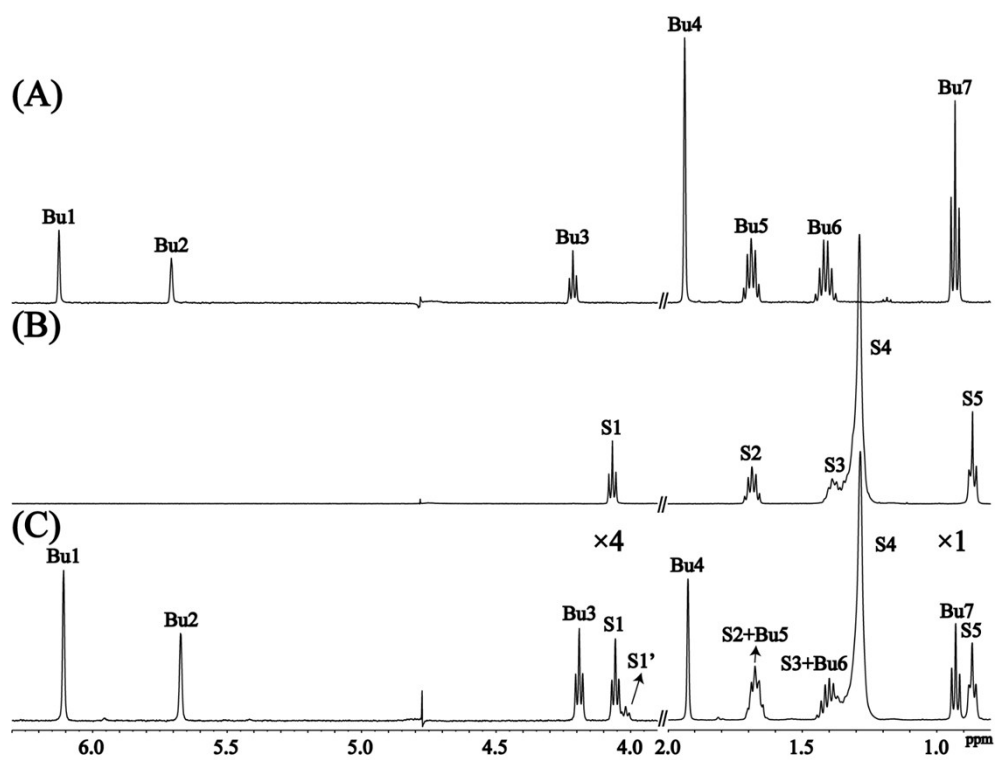

**Fig. S3.**  $^1\text{H}$  NMR spectra of the pure butyl methacrylate saturated solution at the concentration of 2.24 mM (A), the pure SDS solution at the concentration of 1.87 mM (B) and the SDS/butyl methacrylate solution with the SDS concentration of 4.43 mM (C).

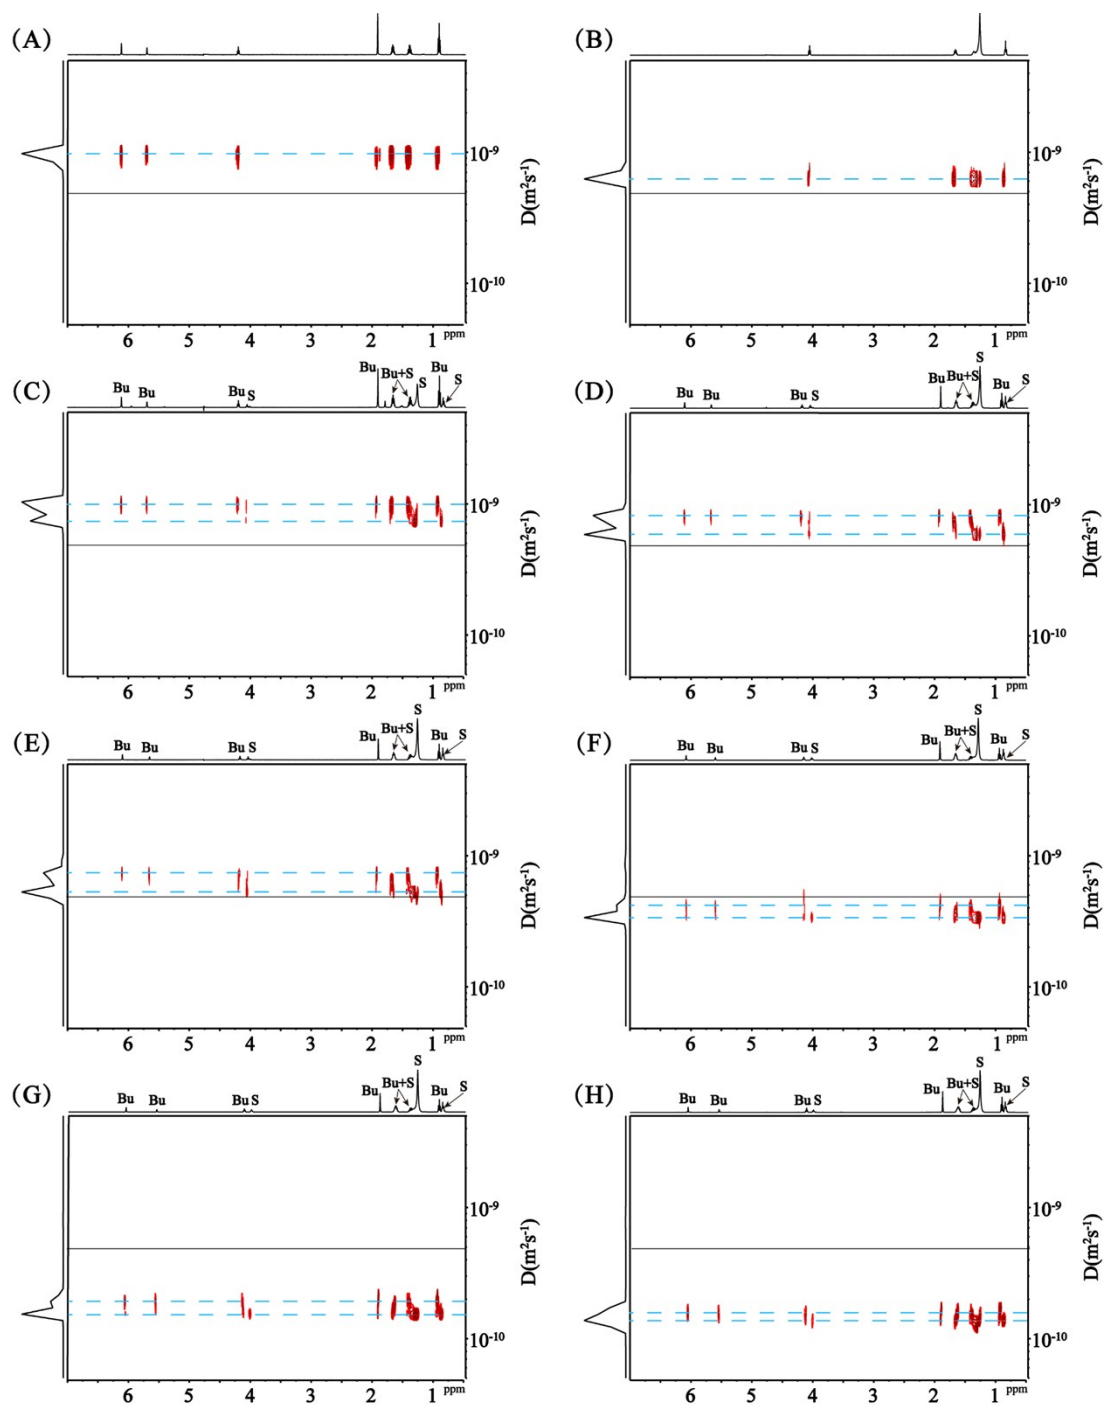

**Fig. S4.** 2D DOSY plots for the pure butyl methacrylate saturated solution at the concentration of 2.24 mM (A), the pure SDS solution at the concentration of 0.954 mM (B), and SDS/butyl methacrylate solutions with SDS concentrations of 1.47 (C), 4.43 (D), 5.86 (E), 17.0 (F), 51.9 (G) and 70.5 (H) mM. The black horizontal line at the  $D$  value of  $5.0 \times 10^{-10} \text{ m}^2 \text{ s}^{-1}$  of the diffusion dimension is a reference to mark the variation of the diffusion coefficients.

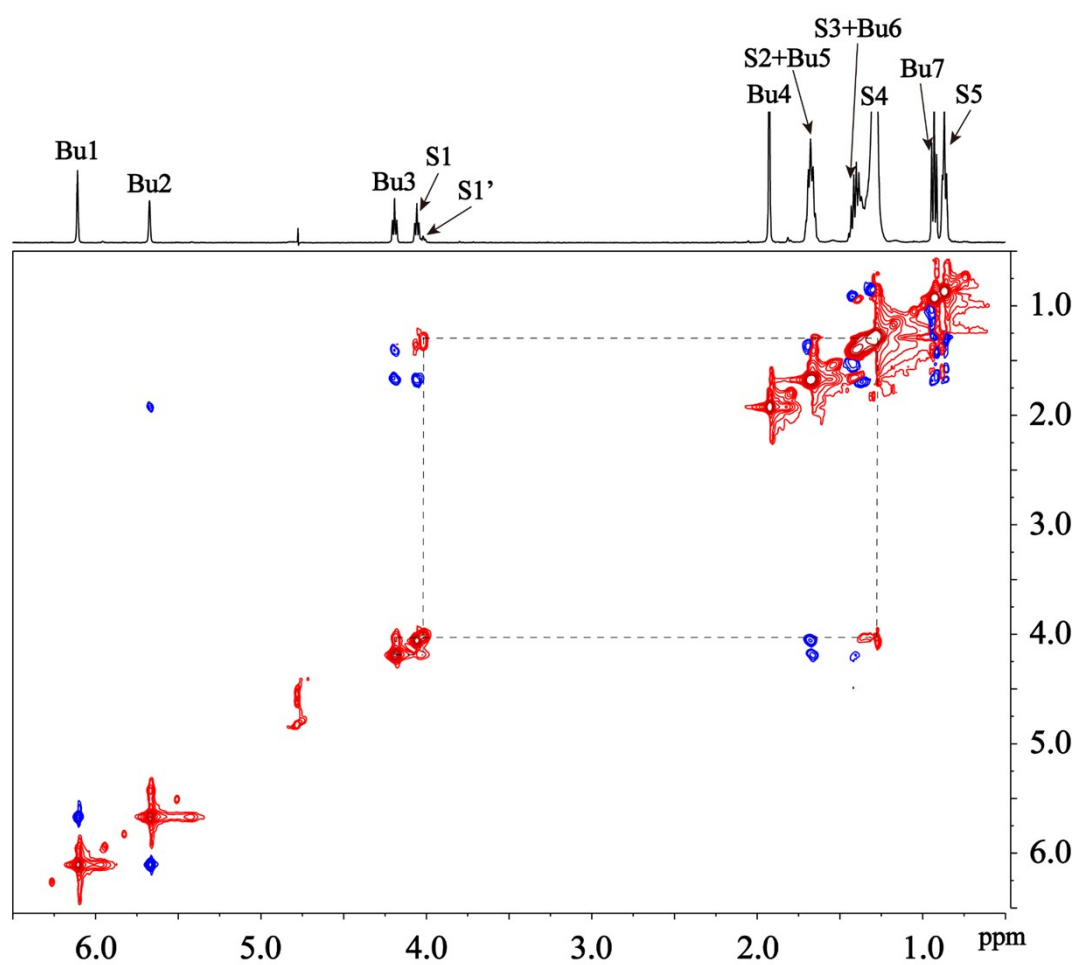

**Fig. S5.** 2D NOESY spectrum with a mixing time of 0.5 s for the SDS/butyl methacrylate solution with the SDS concentration of 4.43 mM.

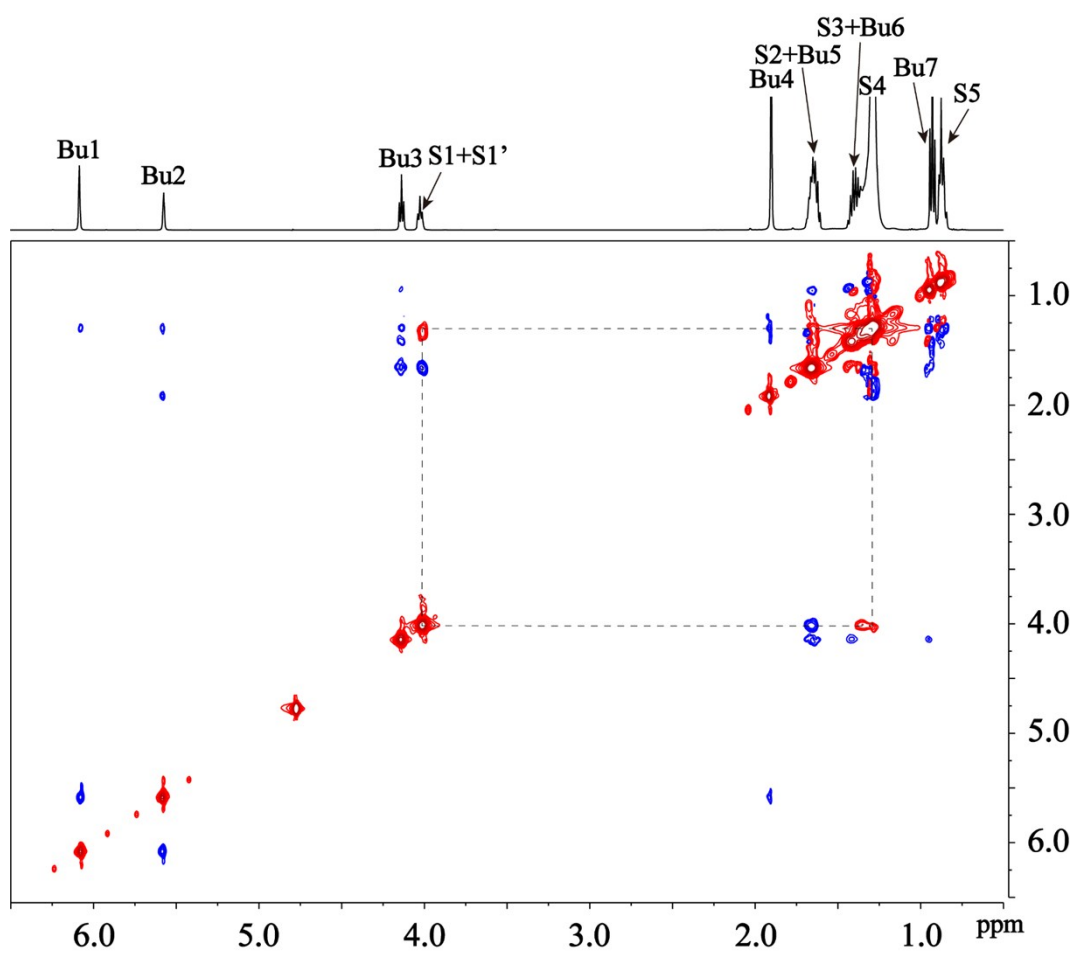

**Fig. S6.** 2D NOESY spectrum with a mixing time of 0.5 s for the SDS/butyl methacrylate solution with the SDS concentration of 70.5 mM.
